# Supplementary material for: Alpha oscillations and traveling waves: Signatures of predictive coding?
Source: PLoS Biol. 2019 Oct 3;17(10):e3000487. doi: 10.1371/journal.pbio.3000487 (PMC6776260; doi:10.1371/journal.pbio.3000487)
Supplement: S2 Data — (XLSX) [file pbio.3000487.s011.xlsx]

## Sheet: Sheet1
INPUT				CLOSED EYES
BW	FW	LogRatio		BW	FW	LogRatio
0.1079	0.3923	1.2905		0.5077	0.0033	-5.0451
0.0163	0.4843	3.3946		0.1209	0.3862	1.1618
0.1796	0.3208	0.5802		0.3236	0.1767	-0.6049
0.1626	0.3375	0.7305		0.529	0.0037	-4.975
0.2046	0.2955	0.3675		0.3146	0.194	-0.4834
0.1189	0.3813	1.1656		0.4905	0.0067	-4.293
0.1273	0.3781	1.0884		0.2085	0.3014	0.3683
0.2132	0.2873	0.2983		0.4997	0.0015	-5.822
0.0592	0.4412	2.0087		0.5146	0.0194	-3.2791
0.1528	0.3474	0.8211		0.5038	0.0037	-4.9155
0.2174	0.2826	0.262		0.3417	0.1643	-0.7325
0.0438	0.4568	2.3448		0.143	0.3831	0.9859
0.0016	0.4978	5.7457		0.4809	0.0059	-4.4092
0.191	0.3092	0.4817		0.5006	0.0021	-5.4519
0.0825	0.418	1.6221		0.4387	0.065	-1.9093
0.0677	0.4325	1.8539		0.456	0.0447	-2.3223
0.27	0.23	-0.1606		0.5135	0	-Inf
0.1622	0.3378	0.7336		0.3724	0.1285	-1.0642
0.1387	0.3614	0.9579		0.1604	0.3614	0.8123
0.0954	0.4048	1.4448		0.4977	0.0037	-4.8981
