# Supplementary material for: Alpha oscillations and traveling waves: Signatures of predictive coding?
Source: PLoS Biol. 2019 Oct 3;17(10):e3000487. doi: 10.1371/journal.pbio.3000487 (PMC6776260; doi:10.1371/journal.pbio.3000487)
Supplement: S5 Data — (XLSX) [file pbio.3000487.s014.xlsx]

## Sheet: dataVH
smallH	bigH	smallV	bigV
0.38725	0.14237	0.52231	0.60277
1.6474	0.28297	1.6737	1.0454
0.10939	0.60755	0.31909	0.61266
0.9178	0.36194	0.61946	0.31107
-0.26992	0.12784	0.21809	0.47695
0.62333	0.49593	0.1224	0.78594
0.2437	-0.053008	-0.23433	0.17283
-0.3898	0.19474	-0.063974	0.13245
0.53737	0.081355	0.53835	0.33329
0.19896	0.42591	0.28739	0.27903
0.024519	0.30754	-0.25606	0.26743
0.0838	0.55381	0.029918	0.69596
2.2389	1.9466	2.3752	2.226
0.16562	-0.55568	0.63782	0.016261
-0.055652	0.11172	0.28343	0.39074
0.40041	0.39367	0.017501	0.052507
-0.12853	0.31105	0.21855	-0.0082116
1.0538	0.26141	0.75838	0.4162
0.4599	-0.084881	0.42851	0.27496
0.87229	0.93168	0.67999	0.46786
